CORRECTION

# Correction: *In Silico* Screening for Novel Inhibitors of DNA Polymerase III Alpha Subunit of *Mycobacterium tuberculosis* (MtbDnaE2, $H_{37}R_v$ )

Alka Jadaun, Raja Sudhakar D, N Subbarao, Aparna Dixit

There is an error in the second sentence of the second paragraph within the Introduction. The correct sentence is: DnaE2 belongs to the C family of error prone DNA polymerases that has been reported to be responsible for pathogen survival and drug resistance [6].

There is an error in reference 6. The author names are listed incorrectly. The correct reference is: Boshoff HI, Reed MB, Barry CE 3rd, Mizrahi V. DnaE2 polymerase contributes to in vivo survival and the emergence of drug resistance in *Mycobacterium tuberculosis*. *Cell*. 2003; 113:183–193.

## Reference

1. Jadaun A, Sudhakar D R, Subbarao N, Dixit A (2015) *In Silico* Screening for Novel Inhibitors of DNA Polymerase III Alpha Subunit of *Mycobacterium tuberculosis* (MtbDnaE2,  $H_{37}R_v$ ). PLoS ONE 10(3): e0119760. doi: [10.1371/journal.pone.0119760](https://doi.org/10.1371/journal.pone.0119760) PMID: [25811866](https://pubmed.ncbi.nlm.nih.gov/25811866/)

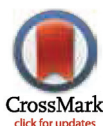

## OPEN ACCESS

**Citation:** Jadaun A, Sudhakar D R, Subbarao N, Dixit A (2015) Correction: *In Silico* Screening for Novel Inhibitors of DNA Polymerase III Alpha Subunit of *Mycobacterium tuberculosis* (MtbDnaE2,  $H_{37}R_v$ ). PLoS ONE 10(5): e0128613. doi:10.1371/journal.pone.0128613

**Published:** May 22, 2015

**Copyright:** © 2015 Jadaun et al. This is an open access article distributed under the terms of the [Creative Commons Attribution License](https://creativecommons.org/licenses/by/4.0/), which permits unrestricted use, distribution, and reproduction in any medium, provided the original author and source are credited.
